# Supplementary material for: Encapsulation of photoactive porphyrinoids in polyelectrolyte hollow microcapsules viewed by fluorescence lifetime imaging microscopy (FLIM)
Source: Royal Society of Chemistry journal article supplement (doi:10.1039/c5ra15504e), 2015-01-01
Supplement: c5ra15504e1.pdf [file c5ra15504e1.pdf]

**ELECTRONIC SUPPLEMENTARY INFORMATION**  
*for the Article*

**Encapsulation of photoactive porphyrinoids in polyelectrolyte hollow microcapsules viewed by Fluorescence Lifetime Imaging Microscopy (FLIM)**

Raquel Teixeira,<sup>\*a†</sup> Vanda Vaz Serra,<sup>ab</sup> Pedro M. R. Paulo,<sup>a</sup> Suzana M. Andrade<sup>a</sup> and Sílvia M .B. Costa<sup>\*a</sup>

a) Centro de Química Estrutural, Instituto Superior Técnico, Universidade de Lisboa, Av. Rovisco Pais 1, 1049-001 Lisboa, Portugal

b) Unidade de Química Orgânica e Produtos Naturais, Departamento de Química, Universidade de Aveiro

**Present address†** 3Bs Research Group in Biomaterials, Biodegradables and Biomimetics, University of Minho, Headquarters of the European Institute of Excellence on Tissue Engineering and Regenerative Medicine, AvePark, 4806-909 Taipas, Guimarães, Portugal.

**Corresponding Authors:** raquel.teixeira@dep.uminho.pt; sbcosta@tecnico.ulisboa.pt

## SUPPLEMENTARY INFORMATION

### 1. Porphyrin/Polyelectrolyte interactions

#### TSPP/PAH

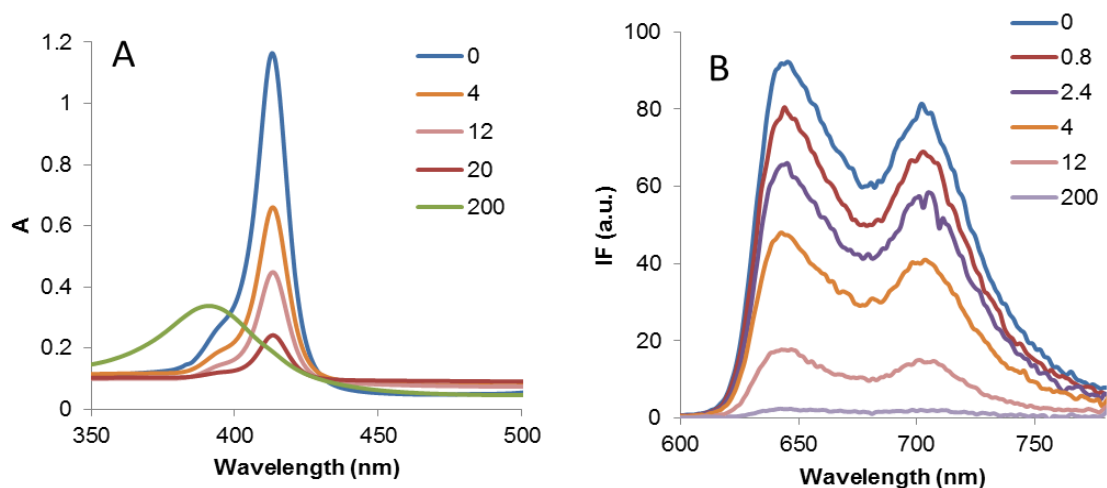

**Fig S1** Absorption (A) and emission spectra (B,  $\lambda_{\text{exc.}} = 400$  nm) of TSPP (5  $\mu\text{M}$ ) with increasing concentrations of oppositely charged polyelectrolyte PAH (concentrations are given in  $\mu\text{M}$ ).

#### TMPyP/PSS

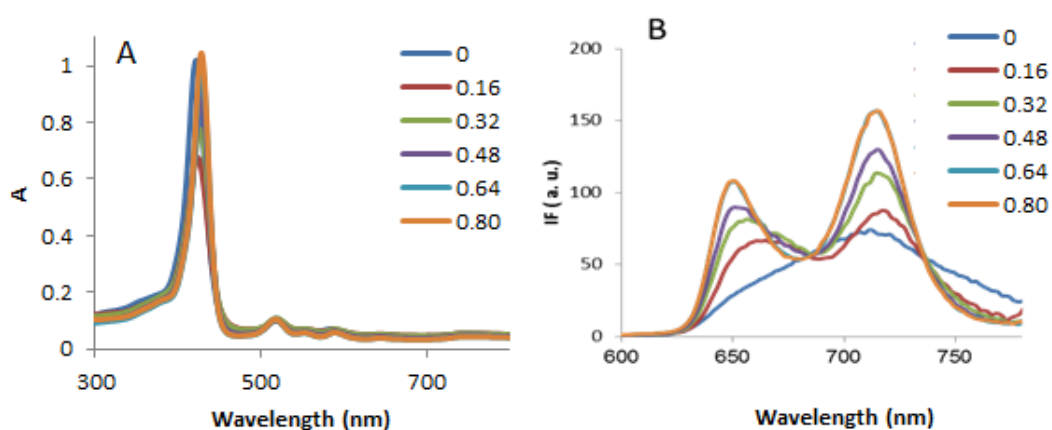

**Fig S2** Absorption (A) and emission spectra (B,  $\lambda_{\text{exc.}} = 400$  nm) of TMPyP (5  $\mu\text{M}$ ) with increasing concentrations of oppositely charged polyelectrolyte PSS (concentrations are given in  $\mu\text{M}$ ).

### BOPYP/PSS

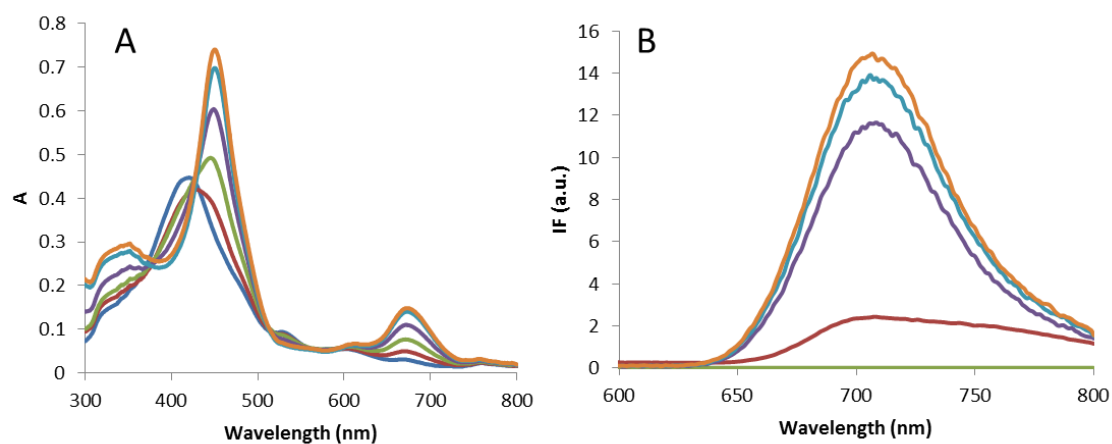

**Fig S3** Absorption (A) and emission spectra of BOPYP (B.  $\lambda_{exc.} = 440$  nm) with increasing concentrations of PSS at pH = 2.0 (concentrations are given in  $\mu\text{M}$ ).

### BOPYP/PAA

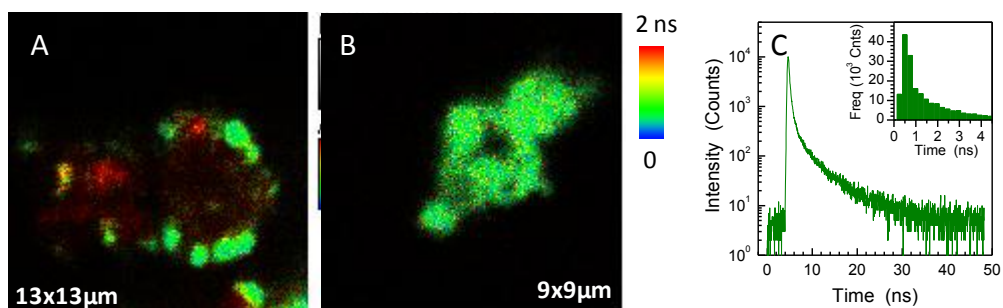

**Fig. S4** FLIM images of polyelectrolyte microcapsules  $(\text{PAA/PSS})_4\text{BOPYP}$ , after  $\text{CaCO}_3$  dissolution. B) Circular aggregate formed between BOPYP and polyelectrolyte PAA prior to adsorption procedure. C) Fluorescence decay and lifetime histogram (inset) from image A.

## 2. Mechanism of TCPP-PAH synthesis

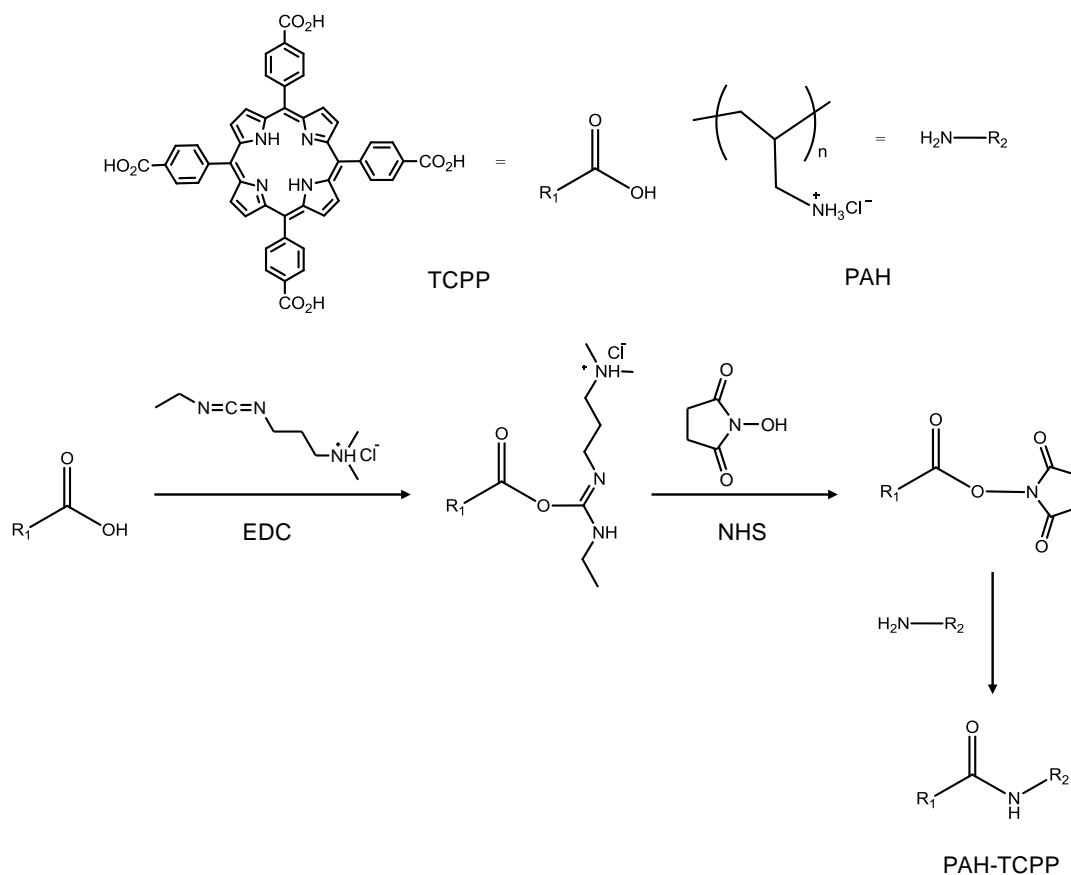

**Fig. S5** Labelling of the positive polyelectrolyte (PAH) with a hydrophobic porphyrin (TCPP) using amide coupling reaction in two steps.

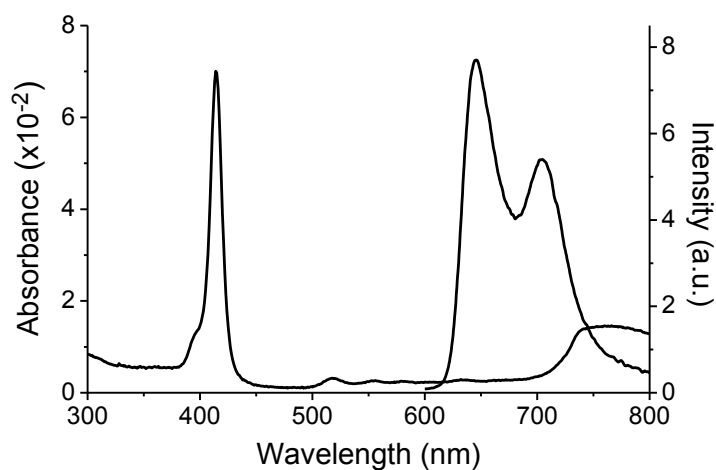

**Fig S6** Absorption and emission spectra of coupled TCPP/PAH incorporated in PAH/PSS polyelectrolyte microcapsules. The pH of the colloidal suspension is 7.0; the emission spectrum was obtained with an excitation at the maximum of the Soret absorption band.

### 3. Hollow Microcapsules with Phthalocyanines

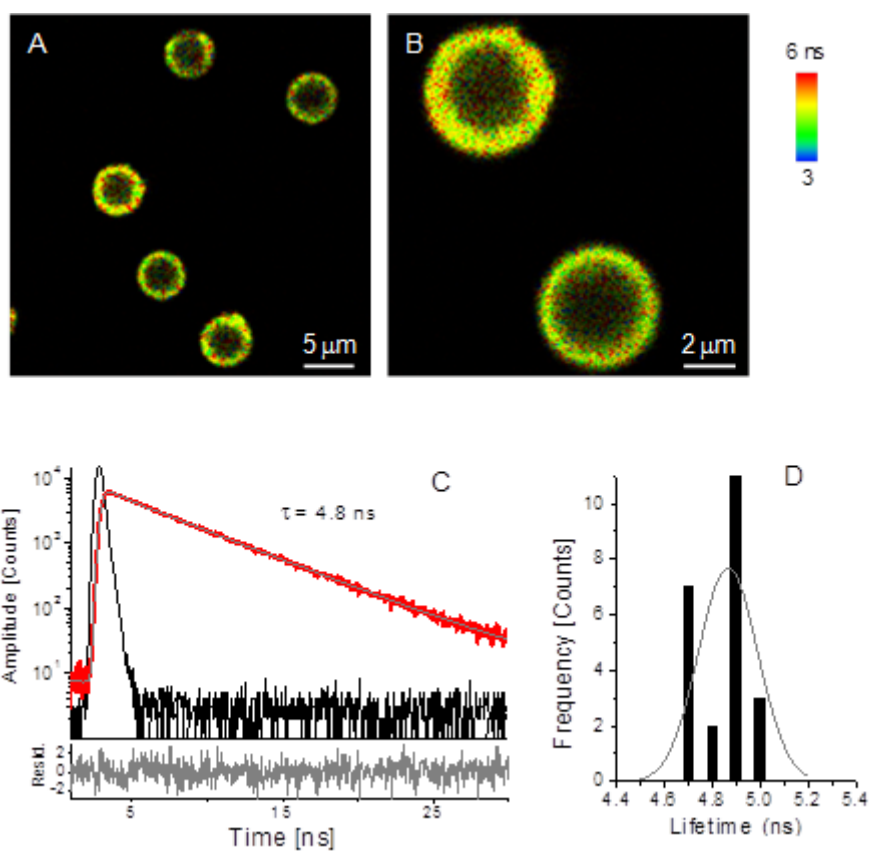

**Fig.S7** (A) and (B) FLIM images of AIPc<sub>4</sub> in PAH/PSS microcapsules; (C) Fluorescence decay of a point in the image; and (D) Histogram of the lifetimes obtained from analysis of several point decays, obtained from different images.

#### 4. Microcapsules with Gold Nanoparticles (AuNPs) and AIPCS<sub>x</sub>

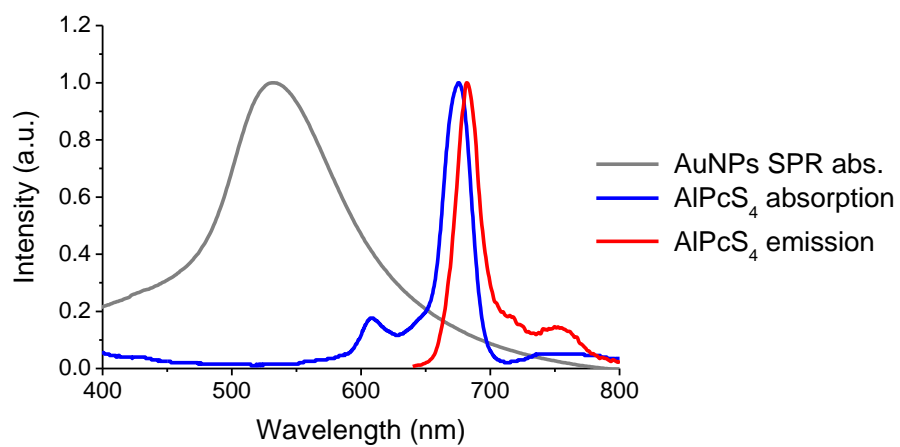

**Fig. S8** Absorption and emission spectra of a tetra-sulfonated phthalocyanine (AIPcS<sub>4</sub>) superimposed to the red-edge of the surface plasmon resonance absorption of AuNPs.
